# Supplementary material for: In situ DRIFT studies on N2O formation over Cu-functionalized zeolites during ammonia-SCR
Source: Royal Society of Chemistry journal article supplement (doi:10.1039/d2cy00247g), 2022-01-01
Supplement: d2cy00247g1.pdf [file d2cy00247g1.pdf]

## Supplementary Information

|             | Cu-SSZ-13 |         | Cu-ZSM-5 |         | Cu-BEA  |         |
|-------------|-----------|---------|----------|---------|---------|---------|
| Element     | Weight%   | Atomic% | Weight%  | Atomic% | Weight% | Atomic% |
| <b>O K</b>  | 62        | 74      | 56       | 69      | 54      | 68      |
| <b>Al K</b> | 2.7       | 1.9     | 3        | 2.2     | 3.2     | 2.4     |
| <b>Si K</b> | 34        | 23      | 38       | 28      | 41      | 29      |
| <b>Cu K</b> | 1.3       | 0.39    | 2.5      | 0.80    | 1.7     | 0.53    |

Table S1. Elemental analysis of the Cu-SSZ-13, Cu-ZSM-5, and Cu-BEA samples by EDX.

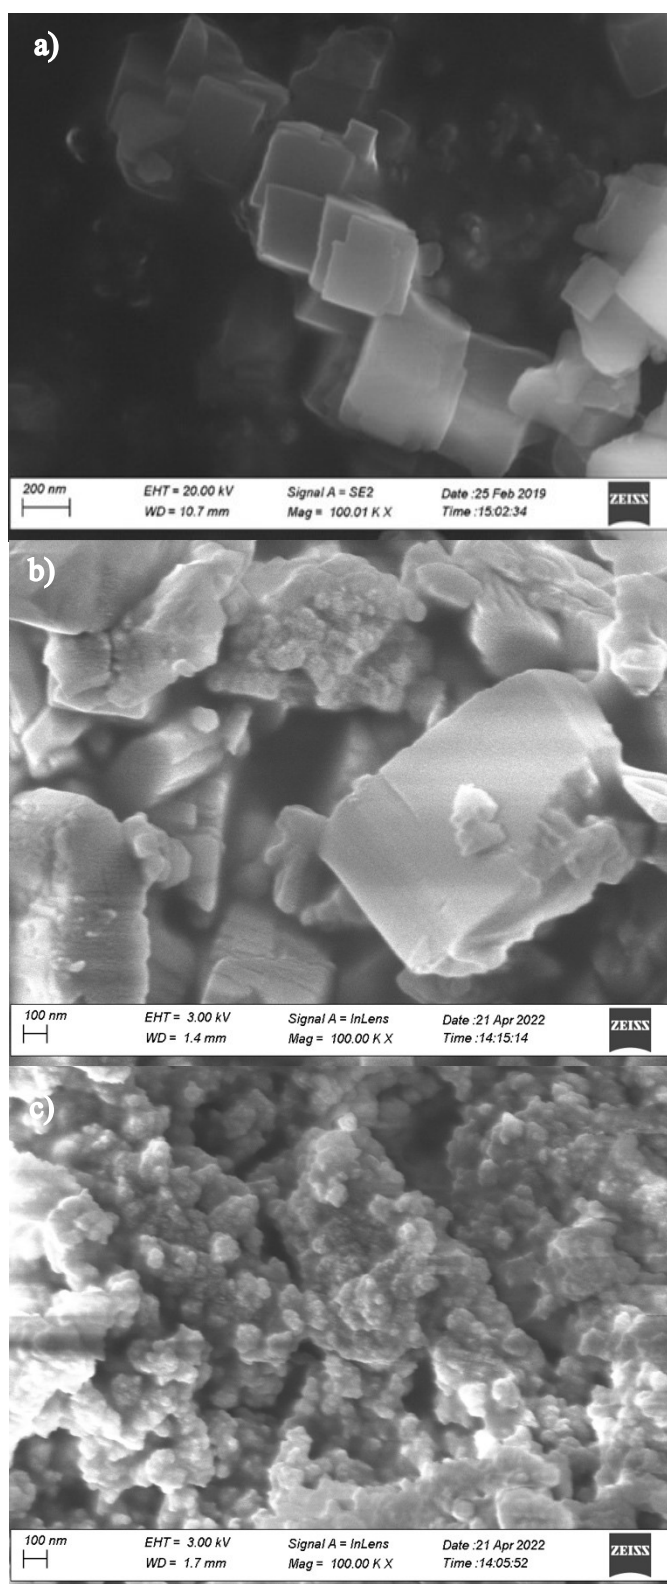

Fig. S1. SEM images of a) Cu-SSZ-13, b) ZSM5, and c) BEA zeolite samples.

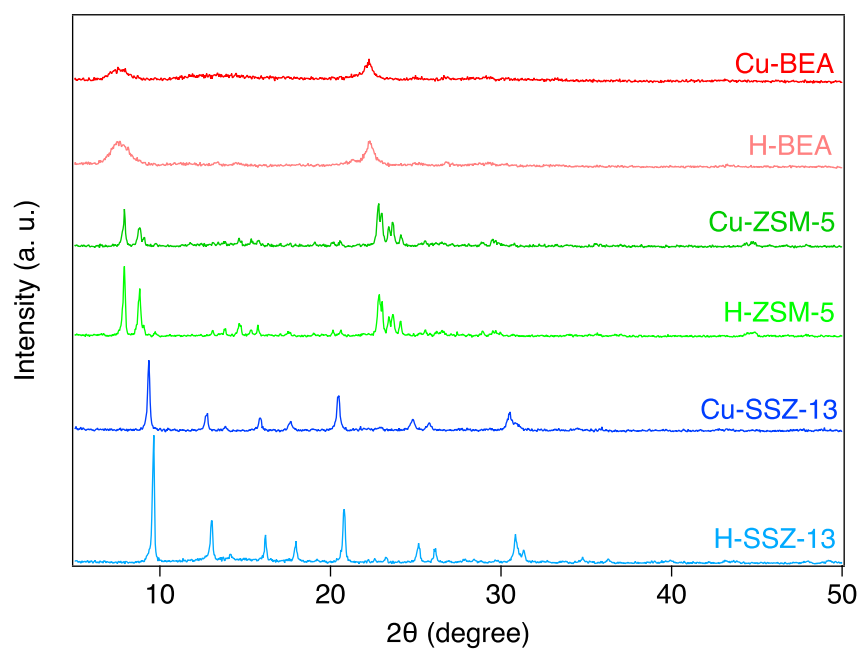

Fig. S2. XRD images for H-and Cu-type samples.

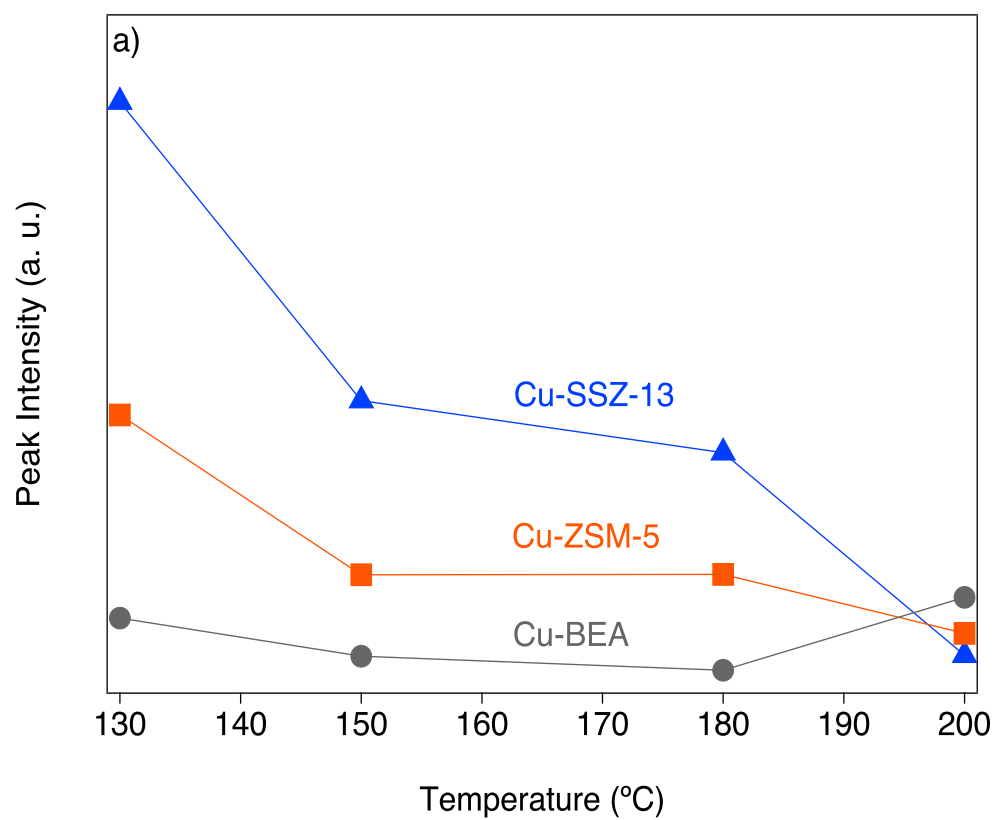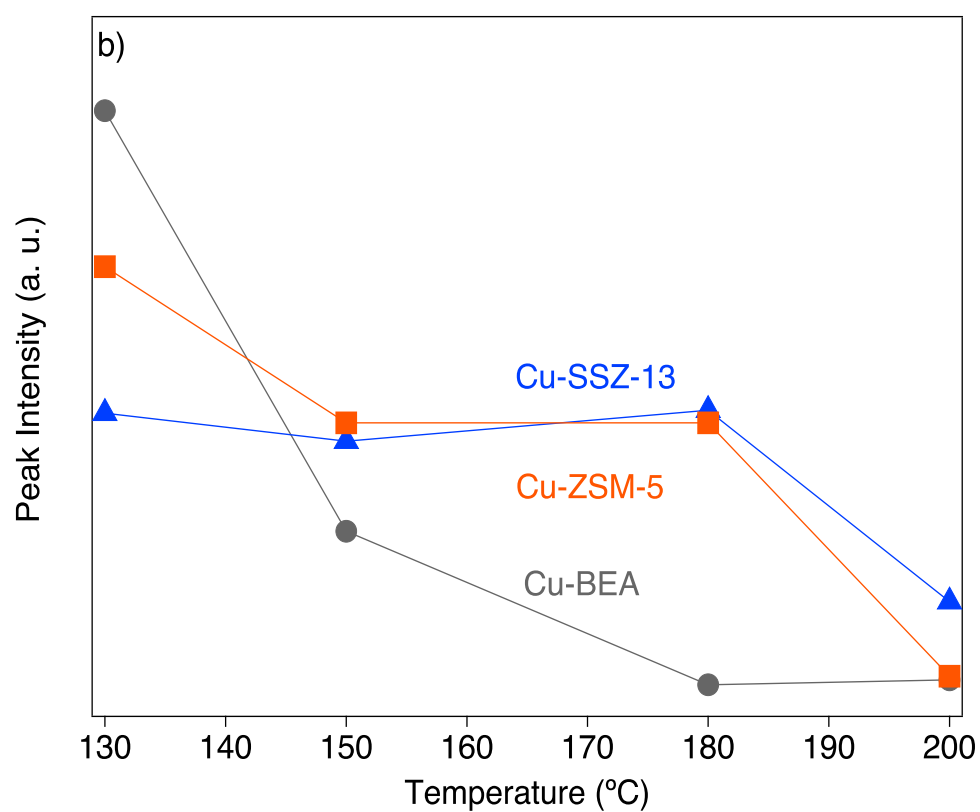

Fig. S3. Peak intensity values for a)  $\text{NO}^+$  and b) nitrate species for Cu-SSZ-13, Cu-ZSM-5,

and Cu-BEA samples during NO oxidation experiment, at 130, 150, 180, and 200 °C.

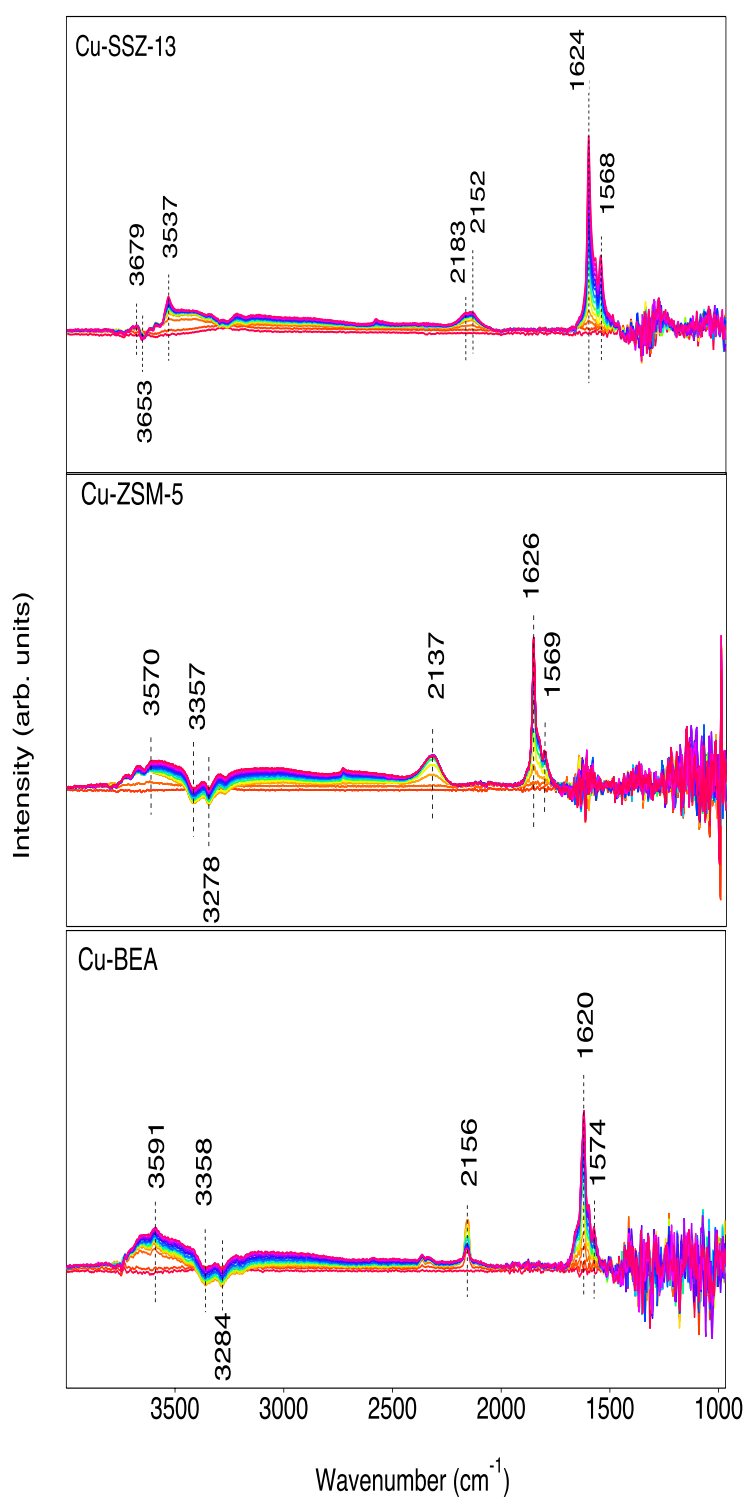

Fig. S4. In situ DRIFT spectra at 200 °C were obtained for samples upon exposure to (400 ppm NO and 10% O<sub>2</sub>) at a flow rate of 10 mL/min for Cu-SSZ-13, Cu-ZSM-5 and Cu-BEA samples.

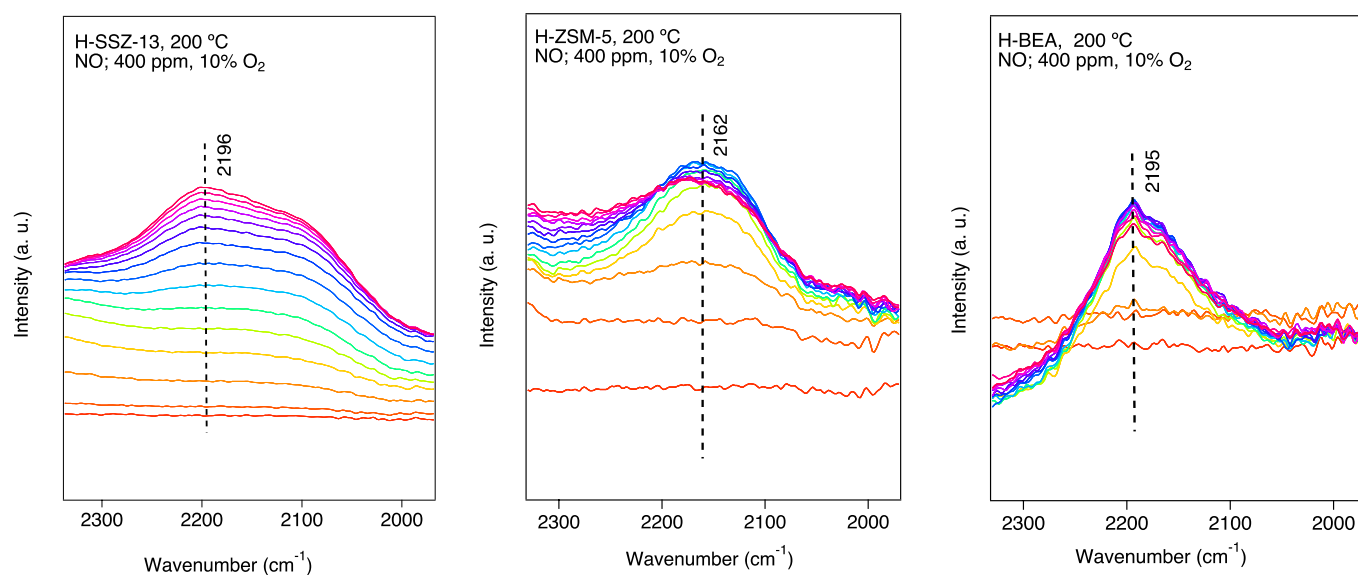

Figure S5. In situ DRIFT spectra at 200 °C obtained for samples upon exposure to (400 ppm NO and 10% O<sub>2</sub>) at a flow rate of 10 mL/min for H-SSZ-13, H-ZSM-5 and H-BEA samples.

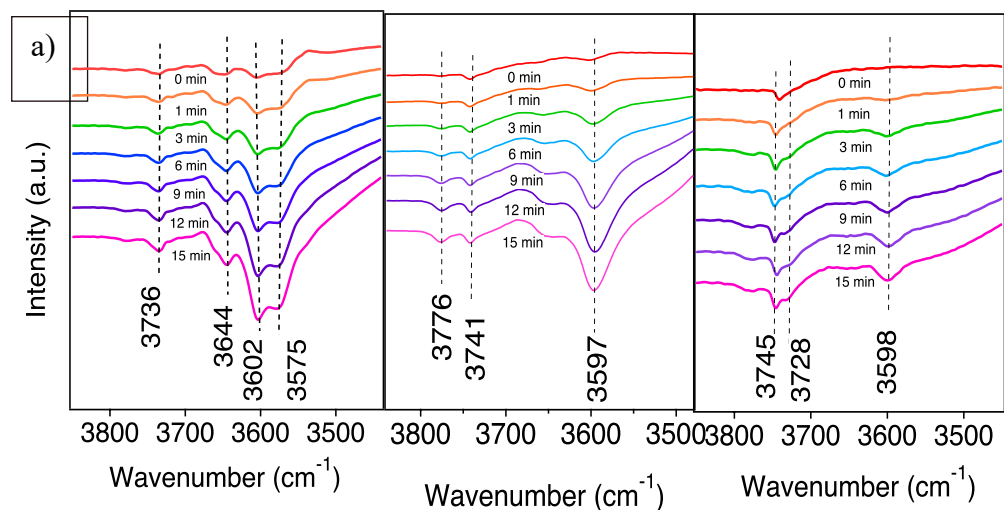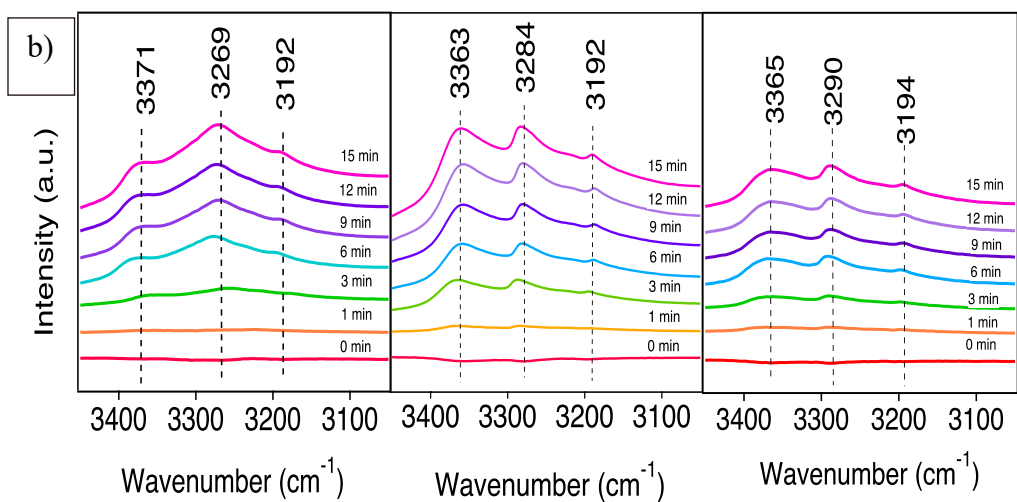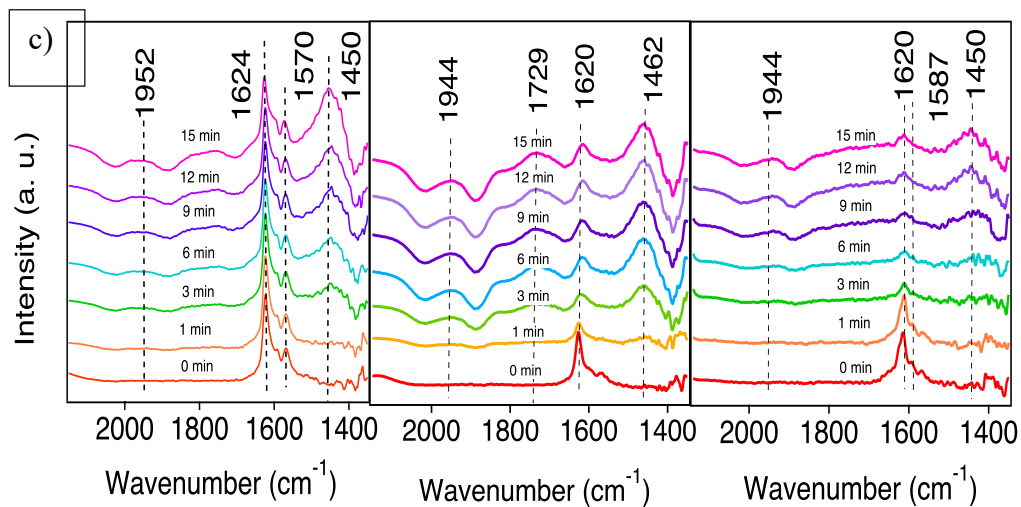

Figure S6. In situ DRIFT spectra of a) O-H, b) N-H Stretching c) N-H bending vibrational region at 200 °C were obtained for three samples upon exposure to (400 ppm NO, 400 ppm NH<sub>3</sub> and 10% O<sub>2</sub>) at a flow rate of 10 mL/min.

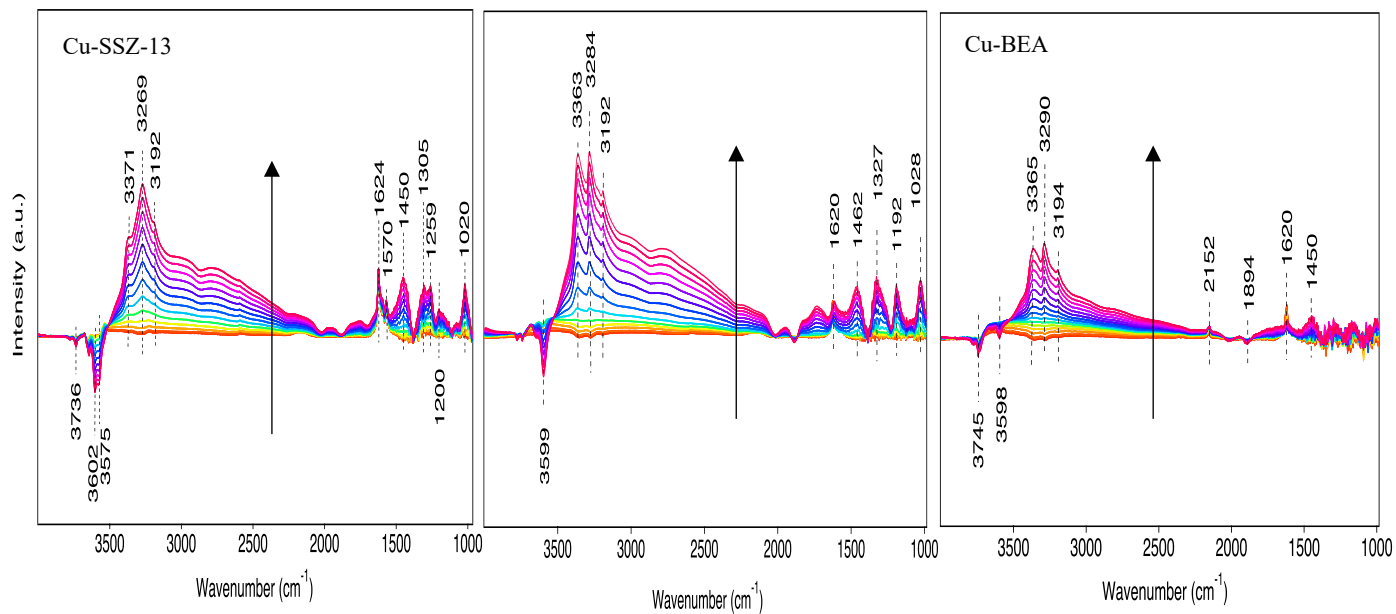

Figure S7. In situ DRIFT spectra at 200 °C Cu-ZSM-5 and for samples upon exposure to (400 ppm NO, 400 ppm NH<sub>3</sub> and 10% O<sub>2</sub>) at a flow rate of 10 mL/min for Cu-SSZ-13, Cu-ZSM-5, and Cu-BEA samples.



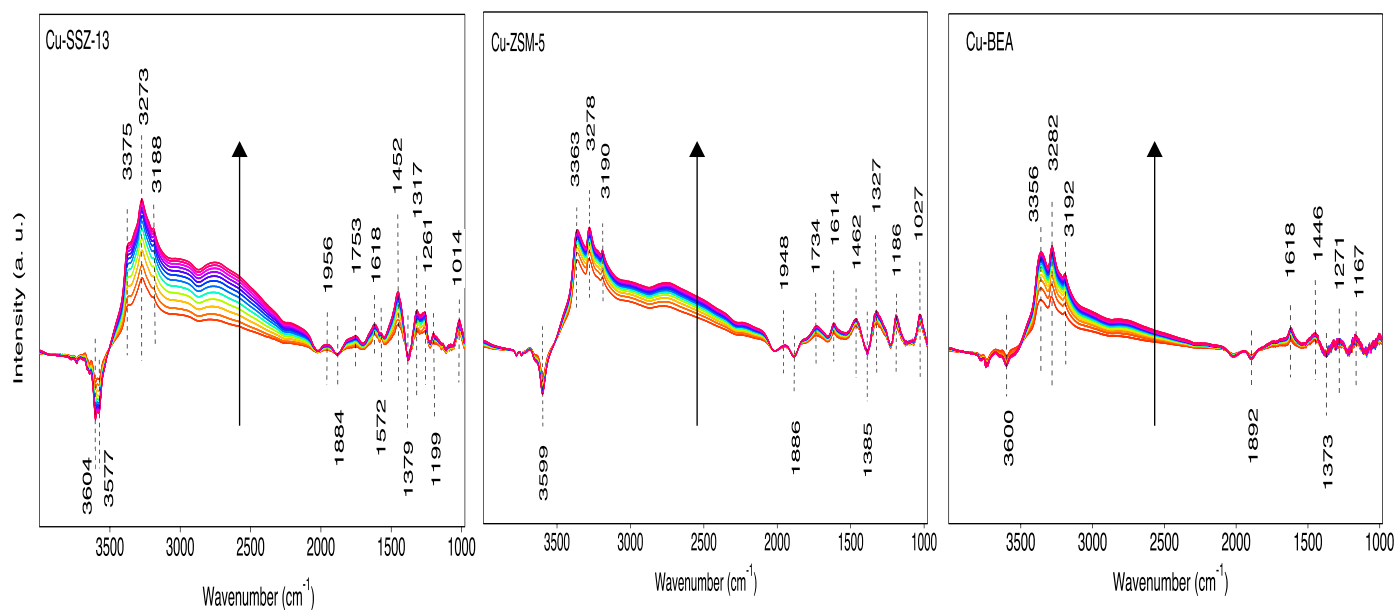

Figure S8. In situ DRIFT spectra at 200 °C were obtained for samples upon exposure to (400 ppm NH<sub>3</sub> and 10% O<sub>2</sub>) at a flow rate of 10 mL/min for Cu-SSZ-13, Cu-ZSM-5, and Cu-BEA samples.

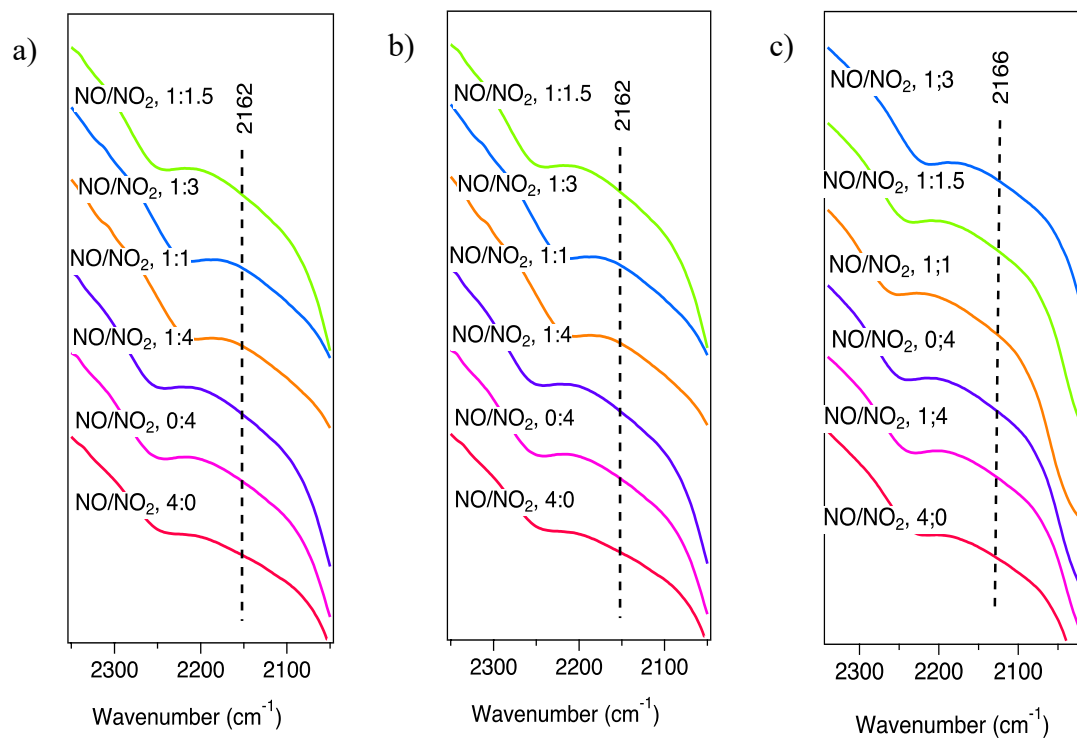

Figure S9a. DRIFT spectra for different NO/NO<sub>2</sub> ratios over Cu-SSZ-13 zeolite at a) 220, b) 200 and c) 180 °C

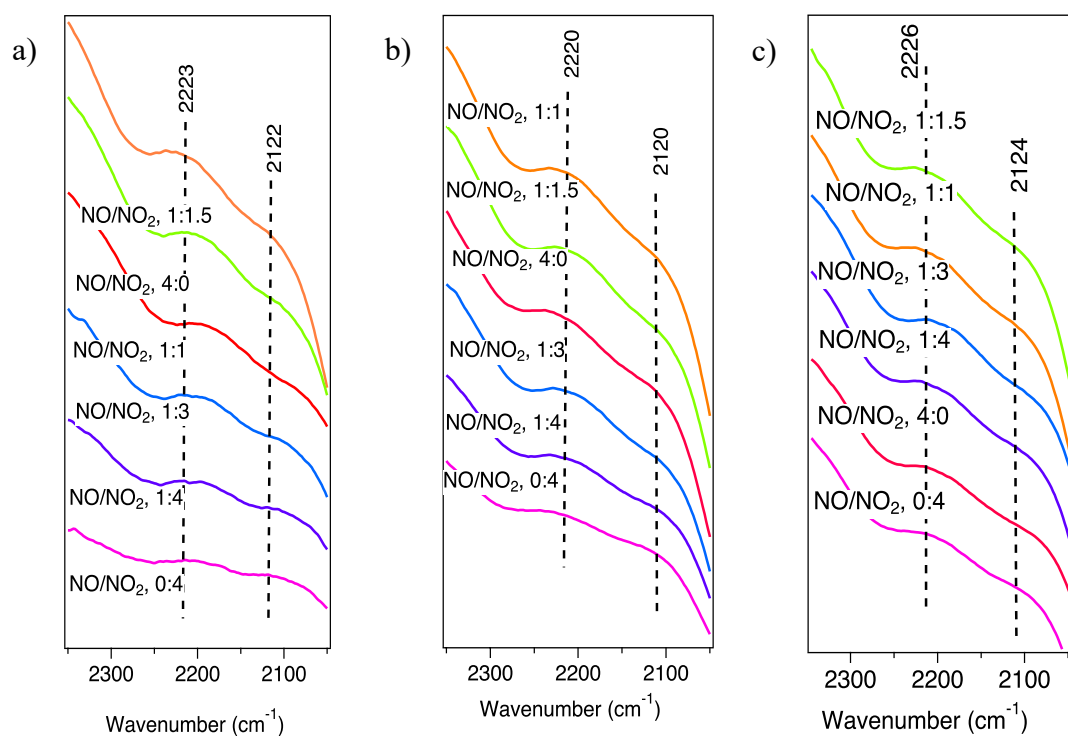

Figure S9b. DRIFT spectra for different NO/NO<sub>2</sub> ratios over Cu-ZSM-5 zeolite at a) 220, b) 200 and c) 180 °C

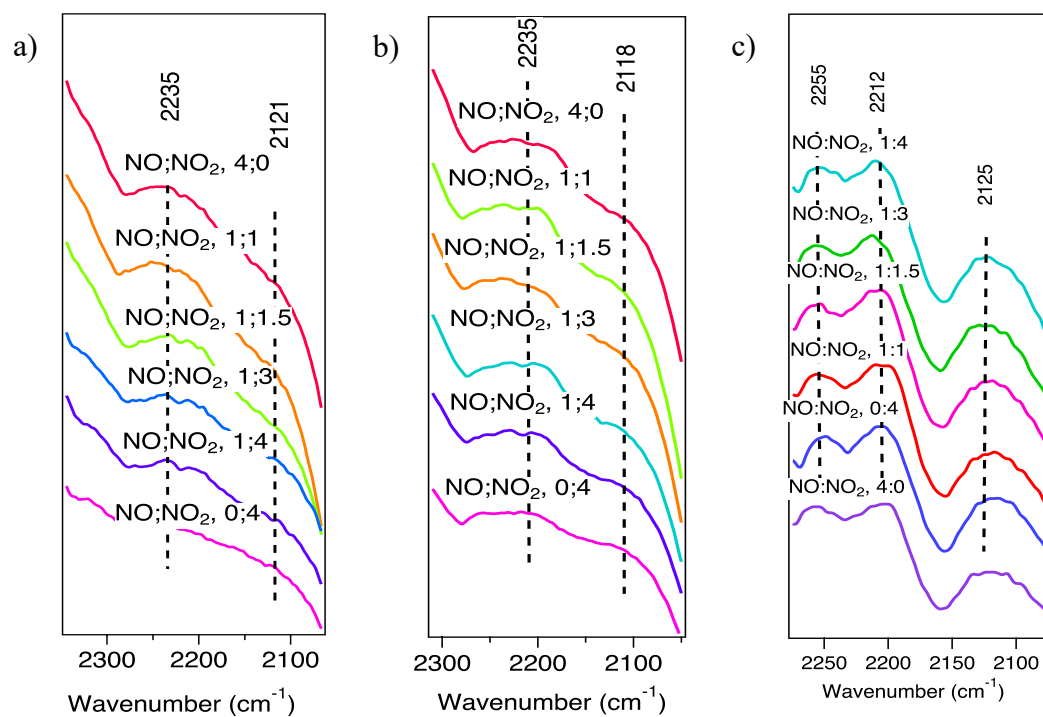

Figure S9c. DRIFT spectra for different NO/NO<sub>2</sub> ratios over Cu-BEA zeolite at a) 220, b) 200 and c) 180 °C

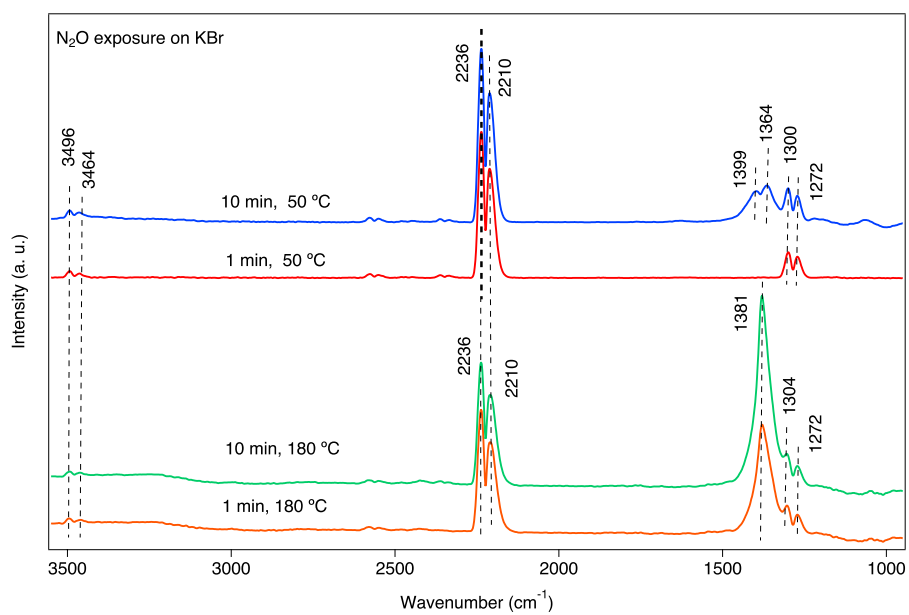

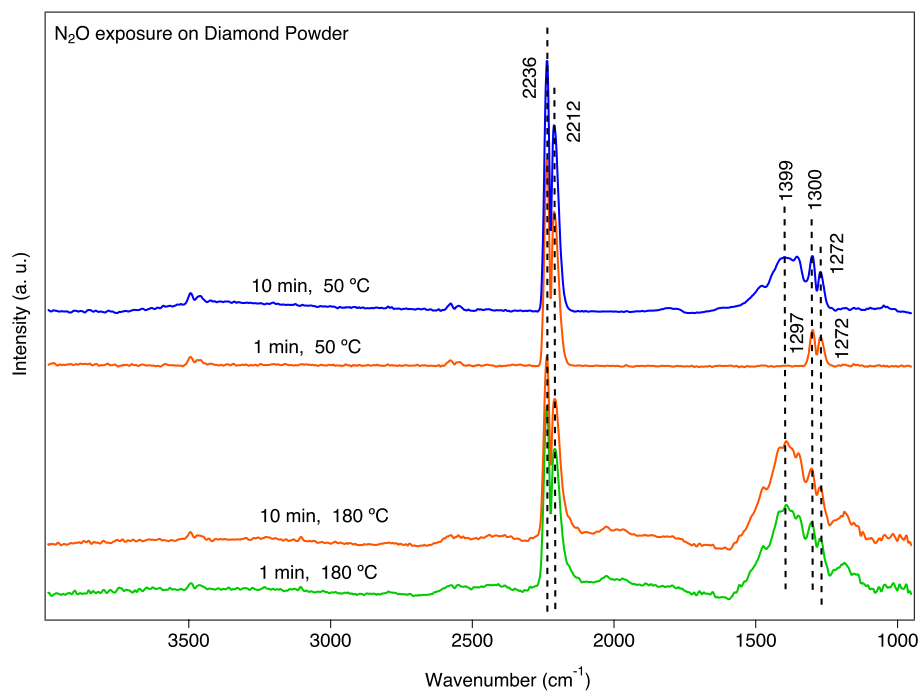

Figure S10. DRIFTS measurements for investigating peak position for  $\text{N}_2\text{O}$  exposure on KBr (top) and diamond powder (bottom).
